## UPTAKE AND METABOLISM OF L-ALANINE BY FRESHLY ISOLATED TROUT (*SALMO TRUTTA*) HEPATOCYTES: THE EFFECT OF FASTING

By P. CANALS, M. A. GALLARDO, J. BLASCO AND J. SÁNCHEZ\*

*Departamento de Bioquímica i Fisiologia, Unitat de Fisiologia,  
Facultat de Biologia, Avenida Diagonal 645, E-08071 Spain*

*Accepted 23 April 1992*

### Summary

Uptake and metabolism of L-alanine by freshly isolated trout hepatocytes has been analyzed. This amino acid is incorporated 'uphill' by different carriers, either Na<sup>+</sup>-dependent or Na<sup>+</sup>-independent. Na<sup>+</sup>-dependent uptake shows the characteristics of an ASC system on the basis of cation dependence and substrate preferences. The Na<sup>+</sup>-independent uptake is split between an L-cysteine-sensitive system and a non-saturable component. No uptake through system A has been found, suggesting that this carrier is lacking in trout hepatocytes. On the basis of inhibition by several preferred amino acids, L-alanine is not taken up through either the L or N systems.

Fasting induced changes in both the uptake of L-alanine and its metabolism to CO<sub>2</sub> and glucose. There was an increase in uptake that showed an inverse relationship with L-alanine plasma levels. Glucose production from L-alanine rose during food deprivation, while CO<sub>2</sub> production showed an initial increase, similar to that of glucose. At the end of the fasting time considered, however, there was a drop in CO<sub>2</sub> production, indicating a different kind of regulation for alanine oxidation and gluconeogenesis.

### Introduction

Blood-borne amino acids are used by liver cells as a source of energy and to produce a variety of molecules (glucose, peptides, etc.). This feature appears to be especially important in carnivorous species, such as salmonids, which utilise carbohydrate poorly (Walton and Cowey, 1982) and require high-protein diets and mild continuous exercise to achieve maximum growth (Davidson and Goldspink, 1977). However, these species are able to regulate their plasma glucose levels, an essential requirement for the efficient functioning of vital tissues such as the central nervous system.

Of the different amino acids, L-alanine is the most gluconeogenic in mammals

\* To whom reprint requests should be sent.

(Kraus-Friedmann, 1984) but, at equimolar concentrations, L-serine is more gluconeogenic than L-alanine in rainbow trout hepatocytes (French *et al.* 1981). However, the plasma concentration of L-alanine is higher than that of L-serine (Ogata and Arai, 1985; present work) and this difference may partially compensate for the differences in gluconeogenesis.

In any case, transport across the liver cell plasma membrane becomes the rate-limiting step for L-alanine metabolism (Fafournoux *et al.* 1983) and several carriers are able to transport amino acids across the membrane of different cell types. These carriers can be distinguished by their substrate specificity, cation dependence and type of regulation (Guidotti *et al.* 1978; Shotwell *et al.* 1983; Barker and Ellory, 1990). Two main Na<sup>+</sup>-dependent carrier systems for short-chain neutral amino acids have been described, the A and ASC systems, as well as one Na<sup>+</sup>-independent system, the L system. There is increasing evidence for another Na<sup>+</sup>-independent system, similar to the ASC system in substrate preference, which has been called the asc system (Fincham *et al.* 1985, 1990; Vadgama and Christensen, 1985).

'ASC' is the commonly accepted abbreviation for an amino acid carrier which has L-alanine, L-serine and L-cysteine as preferred substrates. The upper case denotes that it is energized by means of the transmembrane Na<sup>+</sup> electrochemical gradient. 'asc' is the abbreviation for a carrier similar to the 'ASC' carrier with respect to preferred substrates; the lower case indicates that it is Na<sup>+</sup>-independent. 'A' is the abbreviation for a Na<sup>+</sup>-dependent carrier which has L-alanine and other short-chain neutral amino acids as preferred substrates. Its tolerance to N-methylated analogues differentiates it from the ASC system. 'L' is the abbreviation for a Na<sup>+</sup>-independent carrier which has L-leucine as preferred substrate. Despite its Na<sup>+</sup>-independence, the upper case abbreviation is used. 'N' is the abbreviation for a Na<sup>+</sup>-dependent amino acid carrier which has L-glutamine, L-asparagine and L-histidine as preferred substrates.

There are abundant data on the presence of these carriers in avian and mammalian cells, but references to their expression in other vertebrates are scarce (Inui and Ishioka, 1983; Ballatori and Boyer, 1988; Fincham *et al.* 1990; Machado *et al.* 1991; Gallardo *et al.* 1992). The study of membrane amino acid transport in ectothermic vertebrates is interesting not only from an evolutionary point of view, but also because the A system seems to be the only amino acid carrier subjected to hormonal (Guidotti *et al.* 1978) or adaptive (Shotwell *et al.* 1983) regulation in mammals. However, Moule *et al.* (1987) have reported that the A, ASC and N systems are regulated by cyclic AMP levels in isolated rat hepatocytes. Because changes in cyclic AMP levels can be related to hormone action, the ASC and N systems could also be regulated in the same way.

With reference to fish, Ballatori and Boyer (1988) indicate that skate hepatocytes do not possess the A system, while the study of Inui and Ishioka (1983) (on eels) is inconclusive about the presence of such a system in teleosts, because the alanine analogue used, aminoisobutyric acid, may be carried by both the A and ASC systems. Changes in the physiological conditions of fish, such as fasting, may

induce alterations in amino acid utilization, increasing their transformation to glucose (French *et al.* 1981), although recent data indicate that these and other changes observed in metabolism during fasting can all be explained by a change in the reference units used (Foster and Moon, 1991). Previous reports of the effect of fasting on amino acid catabolism in fish have given no indications of its effect on the transport process across the membrane.

The aim of the present study is to characterize the transport mechanism mediating L-alanine uptake by isolated trout (*Salmo trutta*) hepatocytes and also to analyze the effect of fasting on its uptake and metabolism.

## Materials and methods

### *Animals and chemicals*

Brown trout (*Salmo trutta* L.) (weighing between 250 and 400 g) were obtained from a fish farm (Departament Medi Ambient, Generalitat de Catalunya) in the Pyrenees (Bagà, Spain) and were acclimated to laboratory conditions (a closed water circuit, filled with deionized water and with controlled  $[\text{NH}_4^+]$  and  $[\text{O}_2]$ , maintained at 15°C) for at least 1 week before the experiments were performed. Fasting experiments were carried out directly at the fish farm.

All chemicals and L-alanine uniformly labelled with  $^{14}\text{C}$  ( $159.1 \text{ mCi mmol}^{-1}$ ) were from Sigma Chemical Co. (USA). L-[3- $^3\text{H}$ ]alanine ( $85 \text{ Ci mmol}^{-1}$ ) was from New England Nuclear (Germany).

### *Isolation and incubation of hepatocytes*

Trout were anaesthetized in  $\text{NaHCO}_3$ -buffered MS222 and cells were obtained essentially as described by French *et al.* (1981), except that hyaluronidase was omitted and  $5 \text{ mmol l}^{-1}$  instead of  $25 \text{ mmol l}^{-1}$   $\text{NaHCO}_3$  was used, because of the difference in the gas mixture used to equilibrate all solutions (99.5%  $\text{O}_2$ :0.5%  $\text{CO}_2$ ) before use. Final pH was adjusted to 7.5. Osmolality was determined and adjusted to  $305 \text{ mosmol kg}^{-1}$  with a micro-osmometer (model 3MO, Advanced Instruments, Inc. USA). Cell viability was routinely assessed by means of Trypan Blue exclusion and more than 95% viability was obtained. Cell integrity over time was measured by lactate dehydrogenase (LDH) release; less than 5% of the initial intracellular LDH was found in the medium after 5 h of incubation.

Following isolation, cells were finally suspended in Hanks' solution containing 2% fatty-acid-free bovine serum albumin. In some instances  $\text{K}^+$  was used instead of  $\text{Na}^+$  as the main extracellular cation. No loss of cell viability was observed under these conditions.

### *Uptake and metabolism*

For uptake experiments, both cells and solutions were pre-equilibrated at 15°C before experiments were started by mixing (1:1, v/v) the hepatocyte suspension with the labelled alanine ( $^3\text{H}$ ,  $0.3 \mu\text{Ci ml}^{-1}$  cells) to obtain the desired concentrations and a final 'hepatocrit' of about 5%. Incubations were performed

in a shaking bath at 15°C, using the indicated gas mixture as atmosphere. The uptake was stopped by dilution with Hanks' solution. Cells were rinsed with Hanks' solution and centrifuged (1000 *g* for 8 min at 4°C) three times and finally lysed with 0.1 % Triton X-100. The resulting solution was counted in a well-type liquid scintillation counter (Packard, Great Britain). 2 mmol<sup>-1</sup> amino-oxyacetic acid (AOA; a transaminase inhibitor) was used throughout the uptake experiments.

L-Alanine metabolism experiments were carried out in rubber-sealed vials, previously flushed with the gas mixture. The CO<sub>2</sub> produced from <sup>14</sup>C-labelled L-alanine (1 μCi ml<sup>-1</sup> cells) was trapped in a filter paper containing 2-methoxyethylamine (Merck, Germany). This piece of paper was placed within a plastic well, attached to the rubber seal. Full release of the CO<sub>2</sub> produced by the cells was obtained by acidification of the cell suspension, followed by vigorous shaking for 2 h.

<sup>14</sup>C-labelled glucose production was measured as described by Walton and Cowey (1979). Briefly, the non-metabolised L-alanine was trapped in a cationic exchange resin, Dowex-50W (200–400 mesh), equilibrated with 1 mol l<sup>-1</sup> glucose in water. The non-trapped material was eluted with this solution and placed on an anionic exchange resin AG 1-X8 (200–400 mesh), formate form (Bio-Rad, USA). Labelled glucose was eluted with the same 1 mol l<sup>-1</sup> glucose solution. Incorporation of radioactivity from L-alanine to glycogen was measured as in French *et al.* (1981).

The DNA content of hepatocytes was measured as described by Buckley and Bulow (1987).

For free plasma amino acid analysis, blood was taken by caudal puncture with heparinized syringes. Plasma was separated by centrifugation. Plasma proteins were precipitated with trifluoroacetic acid and free amino acids were separated by ionic exchange chromatography and analyzed by means of a Chromaspeck-Rank Hilger autoanalyzer fitted with a 300 mm length × 3 mm i.d. column of Dionex DC6A resin. Standard lithium citrate buffers were as recommended by the manufacturer. Post-column derivatization with orthophthaldialdehyde (OPA) yields fluorescent derivatives which were detected with a fluorimeter ( $\lambda_{\text{ex}}=395$  nm;  $\lambda_{\text{em}}=475$  nm). Norleucine was used as the internal standard.

Curve-fitting of experimental data was performed by means of non-linear regression analyses (Graph-Pad 2.0 and Sigma Plot 4.0).

## Results

### *L-Alanine uptake*

The time course of uptake of 150 μmol l<sup>-1</sup> L-alanine by freshly isolated trout hepatocytes is shown in Fig. 1. In the absence of metabolism, due to the presence of 2 mmol l<sup>-1</sup> AOA, there is a continuous incorporation with a half-equilibration time of 121.4 ± 21.3 min. Cell water content was measured gravimetrically, yielding a mean value of 75 %. This gave an intracellular concentration at equilibrium of

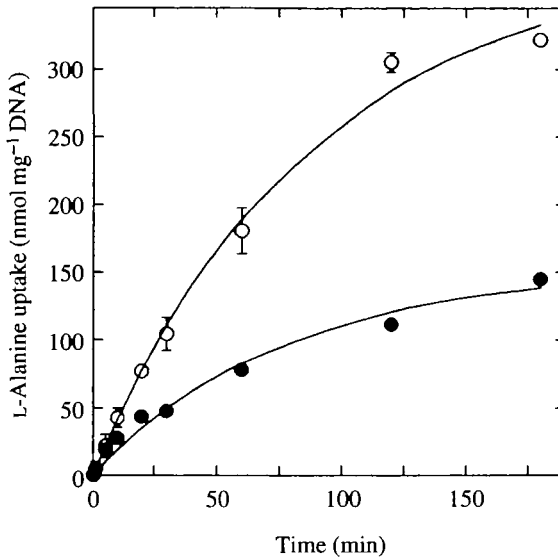

Fig. 1. Time course of L-alanine uptake by trout hepatocytes. Cells were suspended in Hanks' solution and incubated for different times in the presence of  $150 \mu\text{mol l}^{-1}$  L-alanine and  $2 \text{ mmol l}^{-1}$  amino-oxyacetic acid in either  $\text{Na}^+$ -containing (○) or  $\text{K}^+$ -containing (●) medium. Each point is the mean of 3–5 individual experiments. Bars show the standard deviation.

$2.4 \text{ mmol l}^{-1}$ , i.e. trout hepatocytes can concentrate this amino acid 16-fold over extracellular concentrations. When  $\text{K}^+$  was used instead of  $\text{Na}^+$  as the main extracellular cation, a fall in the amount of amino acid incorporation was observed. However, L-alanine was still concentrated within hepatocytes (sixfold). Both  $\text{Na}^+$ -dependent (obtained by subtracting the  $\text{Na}^+$ -independent uptake from the total uptake) and  $\text{Na}^+$ -independent uptakes appear to be saturable, indicating the presence of at least two systems capable of transporting L-alanine uphill across the trout hepatocyte membrane.

When the rate of L-alanine incorporation was plotted against the extracellular concentration, the relationship was nonlinear for both  $\text{Na}^+$ -dependent and  $\text{Na}^+$ -independent uptakes (Fig. 2). The kinetic constants for the  $\text{Na}^+$ -dependent uptake were  $V_{\text{max}} = 5362.5 \text{ nmol mg}^{-1} \text{ DNA } 10 \text{ min}^{-1}$  and apparent  $K_m = 26.7 \text{ mmol l}^{-1}$ . Values for  $\text{Na}^+$ -independent uptake were  $V_{\text{max}} = 590.6 \text{ nmol mg}^{-1} \text{ DNA } 10 \text{ min}^{-1}$  and apparent  $K_m = 9.53 \text{ mmol l}^{-1}$ . These values indicate that trout hepatocyte membranes show a high capacity to carry this amino acid, although  $K_m$  values are far above the physiological range of L-alanine concentrations (about  $500 \mu\text{mol l}^{-1}$ ). A non-saturable component in the  $\text{Na}^+$ -independent uptake was obtained by measuring the inhibition of uptake of a fixed concentration of radioactive amino acid ( $10 \text{ nmol l}^{-1}$ ) by different 'cold' amino acid concentrations ( $10 \mu\text{mol l}^{-1}$  to  $20 \text{ mmol l}^{-1}$ ). A maximal inhibition of 90% was obtained. Thus, 10% of the uptake appears to be non-saturable.

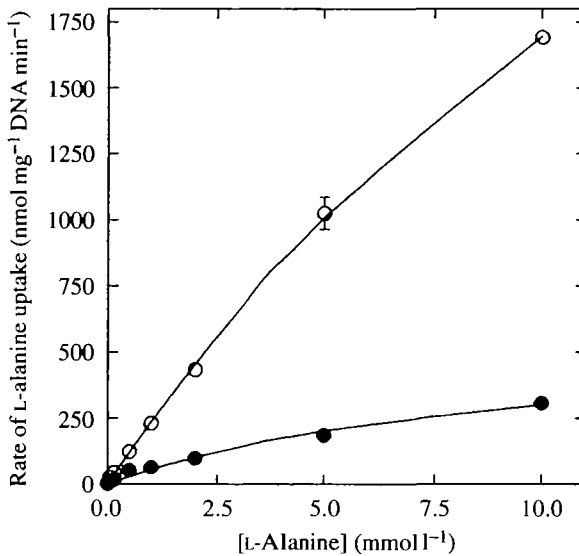

Fig. 2. Concentration dependence of the rate of L-alanine uptake by trout hepatocytes. Initial rates were measured in the presence of buffers containing either sodium or potassium. Cells were incubated for 10 min before the uptake was stopped, as described in Materials and methods. (○) Total uptake. (●) Na<sup>+</sup>-independent uptake. Each point is the mean of 3–5 individual experiments. Bars show the standard deviation. Kinetic constants for both Na<sup>+</sup>-dependent and Na<sup>+</sup>-independent L-alanine uptake are given in the text.

Because there are different Na<sup>+</sup>-dependent transport systems for L-alanine, experiments to obtain information about the nature of those present in trout hepatocytes were carried out. Uptake inhibition by  $\alpha$ -(methylamino)isobutyric acid (MeAIB) is used to ascertain whether a given amino acid is taken up through system A. Fig. 3 shows that this synthetic amino acid does not inhibit the incorporation of 150  $\mu\text{mol l}^{-1}$  L-alanine into trout hepatocytes, indicating that system A is absent from these cells. In the same way, high concentrations of either L-serine or L-cysteine may be used to inhibit incorporation through the ASC system. Fig. 3A also shows that these amino acids inhibit the incorporation of L-alanine, giving a good indication of the presence of the ASC system in trout hepatocytes.

Kilberg *et al.* (1980) found a Na<sup>+</sup>-dependent system in hepatocytes that is relatively specific for glutamine, asparagine and histidine, and which they called system N. Because of the lack of inhibition by high concentrations of these amino acids (except L-asparagine) on the L-alanine uptake, this system (if present in trout hepatocytes) seems to be unable to contribute to the transport of L-alanine across the hepatocyte membrane.

Fig. 3B shows that L-serine and L-cysteine were able to inhibit L-alanine uptake in Na<sup>+</sup>-free medium, while the presence of L-leucine in the range 10  $\mu\text{mol l}^{-1}$  to

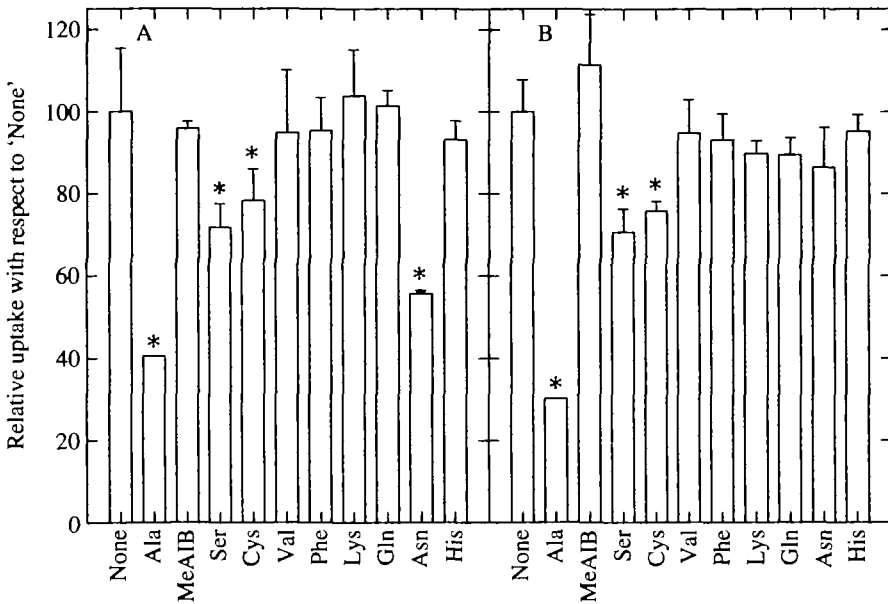

Fig. 3. Effect of different amino acids ( $1 \text{ mmol l}^{-1}$ ) on the  $\text{Na}^+$ -dependent (A) and the  $\text{Na}^+$ -independent (B) uptake of  $150 \mu\text{mol l}^{-1}$  L-alanine by trout hepatocytes. Cells were incubated for 10 min in either  $\text{Na}^+$ -containing or  $\text{K}^+$ -containing medium. Values are the mean of three individual experiments and bars show the standard deviation. Asterisks indicate values significantly different from the control value in the absence of added amino acids ( $P < 0.05$ ).

$10 \text{ mmol l}^{-1}$  did not produce a significant inhibition (data not shown). Because L-leucine is considered to be a better substrate than L-serine or L-cysteine for system L, these data suggest that this system has a low ability to transport L-alanine in trout hepatocytes and that there is a  $\text{Na}^+$ -independent system sensitive to L-serine and L-cysteine inhibition.

#### *Changes in L-alanine uptake and metabolism during 21 days of fasting*

##### *DNA content*

Because fasting alters tissue composition, the parameter used as a reference for experiments on food deprivation is of great importance. Foster and Moon (1991) proposed that DNA content is the best reference. Fig. 4 shows that the DNA content per gram wet mass of hepatocytes drops slightly during the first 2 weeks of fasting, and only after 3 weeks of food deprivation was a rise observed ( $P < 0.05$ ). A more pronounced rise was measured by these authors in the yellow perch, but the fasting period was also longer. Changes in cell size, rather than in cell number, may explain this modification.

##### *L-Alanine uptake*

Fig. 5A shows that fasting increases the rate of uptake of  $150 \mu\text{mol l}^{-1}$  L-alanine

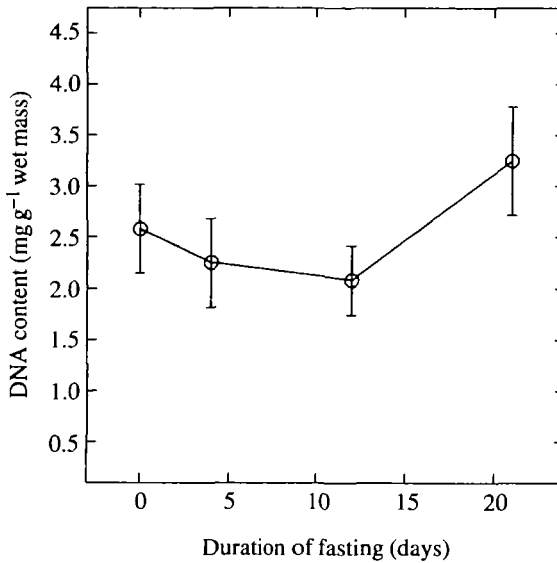

Fig. 4. Variations in DNA content of isolated trout hepatocytes during fasting. Each point is the mean of three individual experiments. Bars show the standard deviation.

and that the  $\text{Na}^+$ -dependent incorporation accounts for most of the changes observed. Fasting has no clear effect on the L-alanine uptake through  $\text{Na}^+$ -independent systems (Fig. 5B). Inhibition of uptake caused by addition of  $10 \text{ mmol l}^{-1}$  L-cysteine reveals that, in a  $\text{Na}^+$ -free medium, only the rate of uptake through the L-cysteine-sensitive system is modified by fasting, while the rest (the non-saturable component) is not.

Table 1 shows the effect of food deprivation on plasma amino acid levels. A general increase was observed during the first half of fasting, probably due to mobilization from muscle (Johnston and Goldspink, 1973; Mommsen *et al.* 1980; Machado *et al.* 1988; Blasco *et al.* 1991); at the end of fasting, a general drop in plasma levels was observed, indicating a high degree of utilization. When uptake of  $150 \mu\text{mol l}^{-1}$  L-alanine from both control and fasted animals was plotted against their L-alanine plasma concentration, there was an inverse relationship between uptake through either the ASC or the  $\text{Na}^+$ -independent L-cysteine-sensitive systems and the plasma L-alanine concentration (Fig. 6).

#### *Glucose and $\text{CO}_2$ formation from L-alanine*

Besides the fasting-induced rise in L-alanine uptake, there was an increase in glucose production from this amino acid during food deprivation, while its oxidation to  $\text{CO}_2$  was depressed (Fig. 7). Glucose formation and L-alanine uptake rate changed almost in parallel, independently of either the nutritional conditions of the cells or the presence/absence of  $\text{Na}^+$  in the incubation medium.

The glucose formed was not incorporated into glycogen since no radioactivity



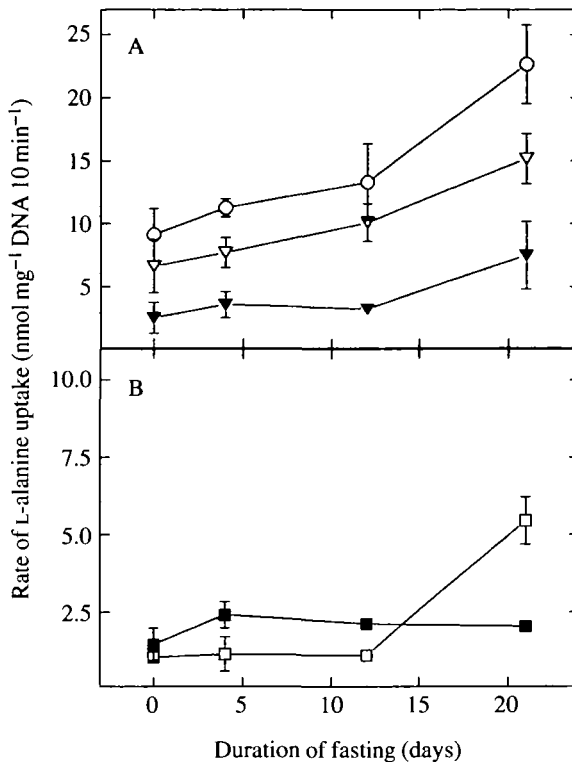

Fig. 5. Effect of fasting time on the rate of uptake of  $150 \mu\text{mol l}^{-1}$  L-alanine by trout hepatocytes. Cells were incubated for 10 min in either  $\text{Na}^+$ -containing or  $\text{K}^+$ -containing medium. (A) Total (○),  $\text{Na}^+$ -dependent (▽) and  $\text{Na}^+$ -independent (▼) uptake. (B)  $\text{Na}^+$ -independent uptake split between asc (□) and non-asc (■) components. Each point is the mean of three individual experiments. Bars show the standard deviation.

was found after the extraction procedure, perhaps because of the loss of glycogen during hepatocyte isolation (Moon *et al.* 1988) or because there is no incorporation of synthesized glucose into this molecule. Neither French *et al.* (1981) nor Foster and Moon (1991) give a clear indication whether this process takes place.

### Discussion

Isolated trout hepatocytes take up L-alanine by means of specific carriers, one of them belonging to the ASC type, on the basis of its preference for short-chain neutral amino acids and its  $\text{Na}^+$ -dependence. The lack of inhibition of uptake by MeAIB allows us to discount the presence of system A, which is the main membrane carrier for short-chain neutral amino acids in mammalian hepatocytes (McGivan *et al.* 1981) and for which MeAIB is considered a selective substrate (Barker and Ellory, 1990). The other uptake system is  $\text{Na}^+$ -independent.

Table 1. *Amino acid levels in plasma after different times of fasting*

| Amino acid<br>( $\mu\text{mol l}^{-1}$ ) | Fasting (days) |          |          |          | Significance |
|------------------------------------------|----------------|----------|----------|----------|--------------|
|                                          | 0              | 4        | 12       | 21       |              |
| Tau                                      | 527±103        | 1377±215 | 997±132  | 451±27   | 0.001        |
| Urea                                     | 446±47         | 523±73   | 478±119  | 795±497  | NS           |
| Asp                                      | 24±4           | 28±2     | 33±2     | 13±1     | 0.01         |
| Thr                                      | 239±33         | 287±27   | 296±45   | 185±28   | NS           |
| Ser                                      | 139±31         | 145±19   | 195±11   | 101±7    | 0.05         |
| Asn                                      | 123±11         | 132±5    | 123±13   | 73±8     | 0.01         |
| Glu                                      | 73±8           | 112±15   | 112±6    | 69±8     | 0.05         |
| Gln                                      | 710±99         | 598±53   | 760±127  | 388±146  | NS           |
| Pro                                      | 141±34         | 220±11   | 239±8    | 113±0    | 0.01         |
| Gly                                      | 257±43         | 367±30   | 349±4    | 191±53   | 0.05         |
| Ala                                      | 549±70         | 946±108  | 1051±70  | 290±57   | 0.001        |
| Val                                      | 784±116        | 959±54   | 899±51   | 317±42   | 0.001        |
| Met                                      | 66±2           | 93±3     | 96±6     | 27±10    | 0.001        |
| Ile                                      | 308±27         | 403±26   | 362±28   | 185±26   | 0.01         |
| Leu                                      | 381±36         | 486±5    | 432±18   | 207±26   | 0.001        |
| Tyr                                      | 34±4           | 76±8     | 71±2     | 46±11    | 0.01         |
| Phe                                      | 85±9           | 162±26   | 126±6    | 118±39   | NS           |
| GABA                                     | 11±7           | 80±21    | 137±20   | 29±16    | 0.05         |
| Orn                                      | 32±6           | 36±2     | 39±4     | 21±3     | NS           |
| Lys                                      | 238±30         | 318±16   | 326±14   | 160±50   | 0.05         |
| His                                      | 89±13          | 85±3     | 135±10   | 53±8     | 0.01         |
| Ans                                      | 65±5           | 90±3     | 89±6     | 47±25    | NS           |
| Arg                                      | 116±13         | 151±5    | 152±7    | 74±22    | 0.05         |
| Essential                                | 2308±226       | 2948±56  | 2829±79  | 1330±196 | 0.001        |
| Non-essential                            | 2254±239       | 2838±109 | 3203±92  | 1312±257 | 0.001        |
| Total                                    | 5090±514       | 7164±289 | 7030±204 | 3094±437 | 0.001        |

Values are expressed as the mean±standard deviation;  $N=3$ .

One-way ANOVA significances during the fasting process are indicated; NS, not significant.

Although there is an important gap in our knowledge of amino acid transport systems in fish, a similar picture has been found for the uptake of L-alanine by skate hepatocytes (Ballatori and Boyer, 1988) although, in this case, most of the  $\text{Na}^+$ -independent uptake was attributed to diffusion. In contrast to both rat and skate hepatocytes, trout hepatocytes show a relatively small incorporation of L-alanine through  $\text{Na}^+$ -independent systems (or a low diffusion component).

Of the  $\text{Na}^+$ -independent systems able to carry L-alanine across the hepatocyte membrane, system L appears to be the most widely distributed among higher vertebrate cells (Barker and Ellory, 1990). From the present results and those of Ballatori and Boyer (1988), who reported that  $20 \text{ mmol l}^{-1}$  leucine inhibited only a small fraction of L-alanine uptake by skate hepatocytes, this system does not seem to play an important role in L-alanine uptake by fish (or at least certain fish) hepatocytes. These authors also provide evidence that, in a  $\text{Na}^+$ -free medium,

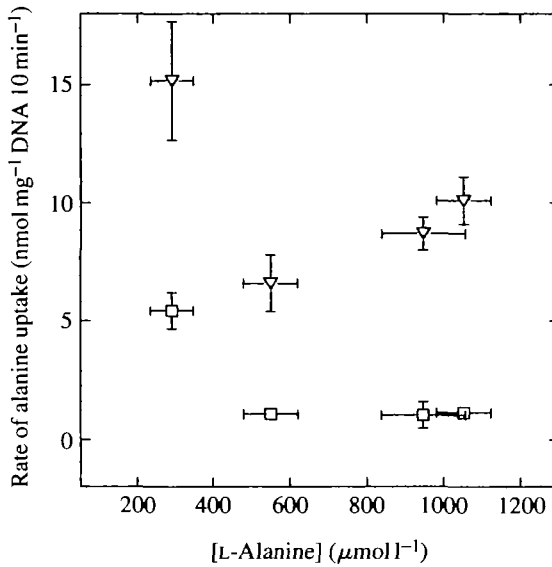

Fig. 6. Relationship between rate of uptake of  $150 \mu\text{mol l}^{-1}$  L-alanine uptake through either the ASC ( $\nabla$ ) or the  $\text{Na}^+$ -independent L-cysteine-sensitive ( $\square$ ) system by trout hepatocytes and plasma L-alanine concentration. Cells from control or fasted animals were incubated for 10 min in  $\text{Na}^+$ -containing or  $\text{Na}^+$ -free medium before the uptake was stopped as described in Materials and methods. Each point is the mean of three individual experiments. Bars show the standard deviation.

only L-serine and L-cysteine were able to inhibit L-alanine uptake, but no further comments were made. Such an inhibition pattern, as well as the  $\text{Na}^+$ -independence, which is similar to that found in the present study, indicates that in the hepatocyte membrane of some fish there is a  $\text{Na}^+$ -independent cysteine-sensitive system, resembling the asc system found in other cell types and able to carry L-alanine (Fincham *et al.* 1985, 1990; Vadgama and Christensen, 1985). This system has mainly been found in erythroid cells, but it has also been described in rat exocrine pancreatic cells (Norman and Mann, 1987). Although an exact characterisation is lacking, the agreement between the present results and those of Ballatori and Boyer (1988) strongly suggests its presence in fish liver cells.

Previous studies have shown that some amino acids are good gluconeogenic substrates for the liver of starved trout (French *et al.* 1981). There may be an increase in the activity of those enzymes related to this metabolic pathway (Morata *et al.* 1982; Foster and Moon, 1991), but there have been no studies on changes in the amino acid uptake ability of fasted hepatocytes. Our data demonstrate that the increase in gluconeogenesis is accompanied by a rise in the alanine uptake ability of hepatocytes during fasting and that most of the changes observed are related to the  $\text{Na}^+$ -dependent system.

Two main explanations may account for the changes observed during fasting: hormonal regulation and/or adaptive regulation. Most of the known hormonal

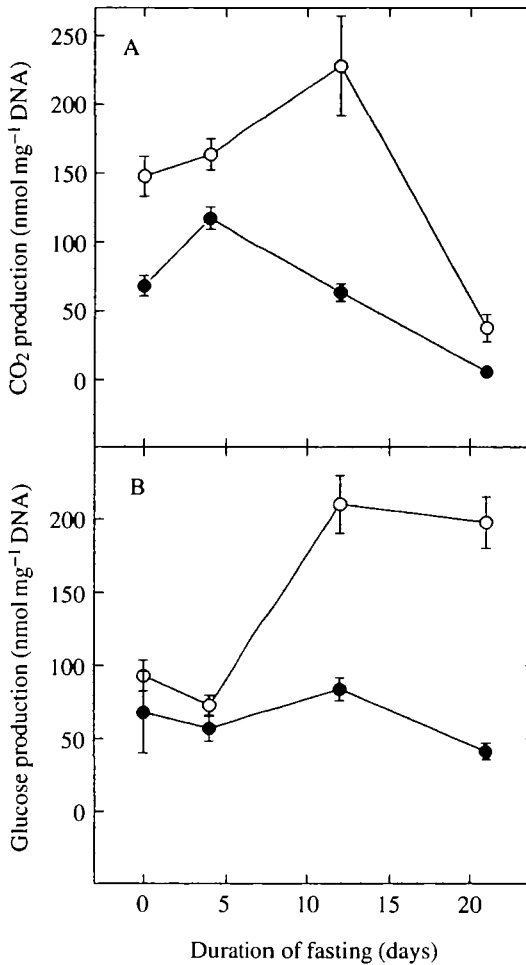

Fig. 7. Effect of fasting time on the CO<sub>2</sub> (A) and glucose (B) production from 150  $\mu\text{mol l}^{-1}$  L-[U-<sup>14</sup>C]alanine. Cells were incubated for 2 h in either Na<sup>+</sup>-containing (○) or K<sup>+</sup>-containing (●) medium. Each point is the mean of three individual experiments. Bars show the standard deviation.

modifications of the amino acid transport ability of cells are related to the effects of insulin and glucagon in mammalian cells, both of which increase their expression of system A (Fehlmann *et al.* 1979). However, levels of both hormones (especially insulin) fall during the food deprivation period (Moon *et al.* 1989; Navarro, 1990) and it does not seem likely that either of them alone can act as a regulator of amino acid uptake during fasting in fish. There are no data about the influence of variations in the glucagon (glucagon-like-peptides)/insulin ratio on amino acid uptake by liver cells, but Moon *et al.* (1989) have proposed that small changes in the glucagon-like-peptides/insulin ratio occurring during fasting could explain the

rise in gluconeogenic fluxes, despite the drop in the plasma concentration of both hormones. These authors found a rise in this ratio, but not in the glucagon/insulin ratio. Because there is a positive relationship between L-alanine uptake and glucose production in these cells, which is independent of the duration of fasting, a rise in the glucagon-like-peptides/insulin ratio could be responsible for the increase in the incorporation of some amino acids into the hepatocytes.

Other hormones that could exercise some kind of regulation on L-alanine uptake by trout hepatocytes are the catecholamines. However, P. Canals, M. A. Gallardo and J. Sánchez (unpublished data) have shown that both adrenaline and noradrenaline effect only a small increase in the uptake of L-alanine by isolated trout hepatocytes and that this increase is not clearly related to  $\alpha$ -receptors. This may be because of the proposed lack of these receptors in trout hepatocytes (Moon and Mommsen, 1990) or because of a seasonal variation in the expression of these catecholamine receptors, as has been proposed for  $\beta$ -receptors of rainbow trout erythrocytes (Cossins and Kilbey, 1989). Glucocorticoids have also been suggested to increase the amino acid uptake by mammalian liver cells (Shotwell *et al.* 1983). Because of the stressor effect of fasting, corticoid levels may be raised in fasting animals, contributing to a rise in amino acid uptake.

A completely different, but not exclusive, explanation of the results obtained is the possible existence of adaptive regulation in trout liver cells, similar to that found in some cell types of higher vertebrates (Guidotti *et al.* 1978). Cultured human fibroblasts showed an enhancement of system A activity when the cells were incubated under conditions of amino acid shortage (derepression phase) and a decrease in activity when they were exposed to a medium supplied with site-A-reactive amino acids (repression phase) (Gazzola *et al.* 1981). Adaptive regulation has been related to the expression of system A and Gazzola *et al.* (1981) indicate that neither the ASC nor the L system is controlled *via* adaptive regulation. However, although human cells express system A, this system does not seem to be present in trout hepatocytes. For this reason, such an adaptation for the ASC system cannot be excluded in the present case, although no attempts to obtain evidence for other requirements (variations in mRNA, protein synthesis, etc.) of such regulation have been made.

Most of studies on the metabolic changes provoked by fasting consider only the experimental 'end point' and the present results agree with these. However, during the first half of the period considered, CO<sub>2</sub> production rose (with a direct relationship to L-alanine uptake; data not shown). This was, perhaps, due to an increase in L-alanine uptake before oxidative activity was depressed, indicating that the L-alanine oxidation rate is not related exclusively to the availability of the amino acid. When L-alanine incorporation is studied in Na<sup>+</sup>-free media, CO<sub>2</sub> production changes in the same way as it does in Na<sup>+</sup>-containing media. This indicates that fasting induces changes in hepatocyte oxidative ability, but the actual nature of these changes remains unclear. Foster and Moon (1991) found similar results for enzyme activities and CO<sub>2</sub> production from L-alanine in yellow perch fasted for 7 weeks, although the results obtained by French *et al.* (1981)

differ somewhat. Changes in citrate synthase activity were apparent in the yellow perch, but not in the rainbow trout.

This study has demonstrated that trout hepatocytes take up L-alanine (and probably some other short-chain neutral amino acids) mostly by means of an ASC system and that system A is absent from these cells. These data give rise to some questions about the evolution of changes in the transport ability of cells and, at the same time, further support the ranking of the ASC system as more important than the A system, as stated by Christensen (1990). Moreover, fasting induces an increase in glucose formation from L-alanine through an increase in its uptake. The possibility that this raised uptake could be due to an expression of system A was tested, giving negative results (data not shown). Thus, changes in the uptake could be due to adaptive regulation and/or hormone control. In any case, these data add a new perspective to the control of amino acid transport, because the ASC system has been excluded from these types of regulations.

This work was supported in part by grants from the Comisió Interdepartamental de Recerca i Tecnologia (AR90-3.3394 and AR91-21) of the Generalitat de Catalunya and in part by ACIU from the Spanish Government. M.A.G. is a recipient of a fellowship from the Generalitat de Catalunya. Free plasma amino acid separations were carried out by Pilar Fernández and Isidre Casals from the 'Serveis Científic-Tècnics de la Universitat de Barcelona'. We would like to express our sincere thanks to Mr Antonino Clemente (Piscifactoria de Bagà, Medi Natural, Generalitat de Catalunya) for his help and logistical assistance, as well as to Mr Robin Rycroft for his editorial help.

### References

- BALLATORI, N. AND BOYER, J. L. (1988). Characteristics of L-alanine uptake in freshly isolated hepatocytes of elasmobranch *Raja erinacea*. *Am. J. Physiol.* **254**, R801–R808.
- BARKER, G. A. AND ELLORY, J. C. (1990). The identification of neutral amino acid transport systems. *Exp. Physiol.* **75**, 3–26.
- BLASCO, J., FERNÁNDEZ, J. AND GUTIÉRREZ, J. (1991). The effects of starvation and refeeding on plasma amino acid levels in carp, *Cyprinus carpio* L. 1758. *J. Fish Biol.* **38**, 587–598.
- BUCKLEY, L. J. AND BULOW, F. J. (1987). Techniques for the estimation of RNA, DNA and protein in fish. In *The Age and Growth of Fish* (ed. R. C. Summerfelt and G. E. Hall), pp. 345–354. Ames: The Iowa State University Press.
- CHRISTENSEN, H. N. (1990). Role of amino acid transport and countertransport in nutrition and metabolism. *Physiol. Rev.* **70**, 43–77.
- COSSINS, A. R. AND KILBEY, R. V. (1989). The seasonal modulation of Na<sup>+</sup>/H<sup>+</sup> exchanger activity in trout erythrocytes. *J. exp. Biol.* **144**, 463–478.
- DAVIDSON, W. AND GOLDSPIK, G. (1977). The effect of prolonged exercise on the lateral musculature of the brown trout (*Salmo trutta*). *J. exp. Biol.* **70**, 1–12.
- FAFOURNOUX, P., RÉMÉSY, C. AND DEMIGNÉ, C. (1983). Control of alanine metabolism in rat liver by transport processes of cellular metabolism. *Biochem. J.* **210**, 645–652.
- FEHLMANN, M., LE CAM, A. AND FREYCHET, P. (1979). Insulin and glucagon stimulation of amino acid transport in isolated rat hepatocytes. Synthesis of a high component of transport. *J. biol. Chem.* **254**, 10431–10437.
- FINCHAM, D. A., MASON, D. K. AND YOUNG, J. D. (1985). Characterization of a novel Na<sup>+</sup>-independent amino acid transporter in horse erythrocytes. *Biochem. J.* **227**, 13–20.

- FINCHAM, D. A., WOLOWYK, M. W. AND YOUNG, J. D. (1990). Characterisation of amino acid transport in red blood cells of a primitive vertebrate, the Pacific hagfish (*Eptaretus stouti*). *J. exp. Biol.* **154**, 355–370.
- FOSTER, G. D. AND MOON, T. W. (1991). Hypometabolism with fasting in the yellow perch (*Perca flavescens*): a study of enzymes, hepatocyte metabolism and tissue size. *Physiol. Zool.* **64**, 259–275.
- FRENCH, C. J., MOMMSEN, T. P. AND HOCHACHKA, P. W. (1981). Amino acid utilisation in isolated hepatocytes from rainbow trout. *Eur. J. Biochem.* **113**, 311–317.
- GALLARDO, M. A., PLANAS, J. AND SÁNCHEZ, J. (1992). L-Serine uptake by trout (*Salmo trutta*) red blood cells: the effect of isoproterenol. *J. exp. Biol.* **163**, 85–95.
- GAZZOLA, G. C., DALL'ASTA, V. AND GUIDOTTI, G. G. (1981). Adaptive regulation of amino acid transport in cultured human fibroblasts. Sites and mechanism of action. *J. biol. Chem.* **256**, 3191–3198.
- GUIDOTTI, G., BORGHETTI, A. F. AND GAZZOLA, G. C. (1978). The regulation of amino acid transport in mammalian cells. *Biochim. biophys. Acta* **515**, 329–366.
- INUI, Y. AND ISHIOKA, H. (1983). Effects of insulin and glucagon on amino acid transport into the liver and opercular muscle of the eel *in vitro*. *Gen. comp. Endocr.* **51**, 213–218.
- JOHNSTON, I. A. AND GOLDSPIK, G. (1973). Some effects of prolonged starvation on the metabolism of the red and white myotomal muscles of the plaice *Pleuronectes platessa*. *Mar. Biol.* **19**, 348–353.
- KILBERG, M. S., HANDLOGTEN, M. E. AND CHRISTENSEN, H. N. (1980). Characteristics of an amino acid transport system in rat liver for glutamine, asparagine, histidine, and closely related analogs. *J. biol. Chem.* **255**, 4011–4019.
- KRAUS-FRIEDMANN, N. (1984). Hormonal regulation of hepatic gluconeogenesis. *Physiol. Rev.* **64**, 170–259.
- MACHADO, C. R., GAROFOLO, M. A. R., ROSELINO, J. E. S., KETTELHUT, I. C. AND MIGLIORINI, R. H. (1988). Effects of starvation, refeeding, and insulin on energy-linked metabolic processes in catfish (*Rhamdia hilarii*) adapted to a carbohydrate-rich diet. *Gen. comp. Endocr.* **71**, 429–437.
- MACHADO, V. L. A., WASSERMANN, G. F. AND MARQUES, M. (1991). *In vitro* effect of insulin on the uptake of glucose and  $\gamma$ -aminoisobutyric acid in the thyroid gland of the turtle (*Chrysemis dorsibigni*). *Gen. comp. Endocr.* **82**, 8–13.
- McGIVAN, J. D., RAMSELL, J. C. AND LACEY, J. H. (1981). Stimulation of alanine transport and metabolism by dibutyl cyclic AMP in the hepatocytes from fed rats. Assessment of transport as a potential rate-limiting step for alanine metabolism. *Biochim. biophys. Acta* **644**, 295–304.
- MOMMSEN, T. P., FRENCH, C. J. AND HOCHACHKA, P. W. (1980). Sites and patterns of protein and amino acid utilization during spawning migration of salmon. *Can. J. Zool.* **61**, 802–811.
- MOON, T. W., FOSTER, G. D. AND PLISETSKAYA, E. M. (1989). Changes in peptide hormones and liver enzymes in the rainbow trout deprived of food for 6 weeks. *Can. J. Zool.* **67**, 2189–2193.
- MOON, T. W. AND MOMMSEN, T. P. (1990). Vasoactive peptides and phenylephrine actions in isolated teleost hepatocytes. *Am. J. Physiol.* **259**, E644–E649.
- MOON, T. W., WALSH, P. J., PERRY, S. F. AND MOMMSEN, T. P. (1988). Effects of *in vivo* beta-adrenoceptor blockade on hepatic carbohydrate metabolism in rainbow trout. *J. exp. Zool.* **248**, 88–93.
- MORATA, P., VARGAS, A. M., SÁNCHEZ-MEDINA, F., GARCÍA, M., CARDENETE, G. AND ZAMORA, S. (1982). Evolution of gluconeogenic enzyme activities during starvation in liver and kidney of the rainbow trout (*Salmo gairdnerii*). *Comp. Biochem. Physiol.* **71B**, 65–70.
- MOULE, S. K., BRADFORD, N. M. AND MCGIVAN, J. D. (1987). Short-term stimulation of Na<sup>+</sup>-dependent amino acid transport by dibutyl cyclic AMP in hepatocytes. Characteristics and partial mechanism. *Biochem. J.* **241**, 737–743.
- NAVARRO, I. (1990). Estructura y fisiología del glucagón en los peces: efecto del ayuno y la alimentación. PhD thesis. University of Barcelona.
- NORMAN, P. S. R. AND MANN, G. E. (1987). Ionic dependence of amino-acid transport in the exocrine pancreatic epithelium: calcium dependence of insulin action. *J. Membr. Biol.* **96**, 153–163.
- OGATA, H. AND ARAI, S. (1985). Comparison of free amino acid contents in plasma, whole blood

- and erythrocytes of carp, coho salmon, rainbow trout, and channel catfish. *Bull. jap. Soc. sci. Fish.* **51**, 1181–1186.
- SHOTWELL, M. A., KILBERG, M. S. AND OXENDER, D. L. (1983). The regulation of neutral amino acid transport in mammalian cells. *Biochim. biophys. Acta* **737**, 267–284.
- VADGAMA, J. V. AND CHRISTENSEN, H. N. (1985). Discrimination of Na<sup>+</sup>-independent transport systems L, T, and ASC in erythrocytes. Na<sup>+</sup> independence of the latter a consequence of cell maturation? *J. biol. Chem.* **260**, 2912–2921.
- WALTON, M. J. AND COWEY, C. B. (1979). Gluconeogenesis by isolated hepatocytes from rainbow trout *Salmo gairdnerii*. *Comp. Biochem. Physiol.* **62B**, 75–79.
- WALTON, M. J. AND COWEY, B. B. (1982). Aspects of intermediary metabolism in salmonid fish. *Comp. Biochem. Physiol.* **73B**, 59–79.
